# Supplementary material for: Development and Implementation of a Prototype Centre of Excellence in Integrated Cancer Services in Thailand: A Feasibility Study
Source: Research Square preprint supplement (doi:10.21203/rs.3.rs-7549444/v1), 2025-11-20
Supplement: Supplementary file 1 [file f39777ae84b060fd26c195d6.docx]

**Set 1: For Service Recipients**

**Princess Agrarajakumari Faculty of Nursing**
Evaluator Code: …………

**Research Project:** *“Development of a Prototype Model for the Center of Excellence in Integrated Cancer Services (Phase 3)”*

**Set 1: Satisfaction Questionnaire on Services of the Center of Excellence in Integrated Cancer Services**

**Instructions:**
This satisfaction questionnaire consists of three parts:

- **Part 1:** General information of service recipients
- **Part 2:** Satisfaction with the services provided by the Center of Excellence in Integrated Cancer Services
- **Part 3:** Interview on opinions and suggestions for service improvement

Please mark the answer that best reflects your actual situation and your opinion.

**Part 1: General Information of Service Recipients**

1. **Sex**
   - Male
   - Female
2. **Age**
   Please specify (full years): …………
3. **Highest Education Level**
   - Primary school
   - Secondary school (lower/upper) or equivalent
   - Bachelor’s degree
   - Master’s degree or higher
4. **Marital Status**
   - Single
   - Widow/Divorced/Separated
   - Other (please specify): …………
5. **Main Occupation**
   - Government officer
   - Retired government officer
   - Company/private employee
   - Trader/Entrepreneur
   - Daily wage laborer
   - Farmer
   - Housework/Unemployed
   - Other (please specify): …………
6. **Monthly Income**
   - Less than 10,000 THB
   - 10,000–20,000 THB
   - 20,001–30,000 THB
   - 30,001 THB and above
   - Other (please specify): …………
7. **Current Illnesses**
   Please specify symptoms and treatments received (if any): …………
8. **Underlying Diseases**
   Please specify (if any). Examples: heart disease, hypertension, kidney disease, etc.: …………
9. **Type of Cancer Services Received at the Center of Excellence in Integrated Cancer Services**
   *(More than one option may be selected)*

- Cancer prevention and risk reduction
- Cancer screening and early detection
- Cancer diagnosis
- Cancer treatment
- Palliative care
- Cancer information services
- Cancer research services

**10. Channels through which you learned about the Center of Excellence in Integrated Cancer Services**
*(More than one option may be selected)*

- Television
- Radio
- Newspaper / Magazine / Journal
- Brochure
- Website
- Social media (e.g., Facebook, Twitter, Email, Web board, etc.)
- Friends / Acquaintances / Word of mouth
- Other (please specify): …………

**Part 2: Satisfaction with the Services of the Center of Excellence in Integrated Cancer Services**

Please indicate your opinion by marking the score that reflects your level of satisfaction according to the following scale:

1 = Least satisfied / Not satisfied
2 = Slightly satisfied
3 = Moderately satisfied
4 = Very satisfied
5 = Most satisfied

|  | **Items** | **level of satisfaction** | | | | |
| --- | --- | --- | --- | --- | --- | --- |
| **1** | **2** | **3** | **4** | **5** |
| **1** | **Structure** |  |  |  |  |  |
| **1.1** | **Organizational Characteristics** |  |  |  |  |  |
| 1) | The location of the center is convenient for accessing services. |  |  |  |  |  |
| 2) | The landscaping is clean and visually pleasant. |  |  |  |  |  |
| 3) | The arrangement of facilities and service rooms is convenient and safe for use. |  |  |  |  |  |
| 4) | Service maps and procedures are clear and easy to understand. |  |  |  |  |  |
| 5) | Public relations and service promotion are appropriate. |  |  |  |  |  |
| **1.2** | **Resources and Equipment** |  |  |  |  |  |
| 6) | Facilities such as parking spaces, ramps, elevators, seating, restrooms, drinking water, newspapers, journals, books, etc., are appropriate. |  |  |  |  |  |
| 7) | Service equipment is sufficient in number. |  |  |  |  |  |
| 8) | Service equipment is of good quality, standardized, and ready for use. |  |  |  |  |  |
| 9) | Service equipment is modern and up-to-date. |  |  |  |  |  |
| 10) | Internet and high-speed Wi-Fi access are convenient to use. |  |  |  |  |  |
| 11) | Public relations media, manuals, and educational materials are modern and sufficient. |  |  |  |  |  |
| **1.3** | **Human Resources** |  |  |  |  |  |
| 12) | Staff knowledge and abilities are appropriate. |  |  |  |  |  |
| 13) | Staff expertise is appropriate. |  |  |  |  |  |
| 14) | The number of staff is sufficient to provide services. |  |  |  |  |  |
| **2** | **Process** |  |  |  |  |  |
| 15) | Service providers are willing, attentive, and caring in providing services. |  |  |  |  |  |
| 16) | Service providers allow opportunities to ask questions and clarify doubts. |  |  |  |  |  |
| 17) | Service providers communicate politely and gently. |  |  |  |  |  |
| 18) | Service providers communicate completely and truthfully. |  |  |  |  |  |
| 19) | Services are provided quickly without long waiting times. |  |  |  |  |  |
| 20) | Services are delivered systematically and in proper sequence, without favoritism or queue skipping. |  |  |  |  |  |
| 21) | Services respect client rights and confidentiality. |  |  |  |  |  |
| 22) | The methods, approaches, and techniques used for providing health education are appropriate. |  |  |  |  |  |
| 23) | Services are provided in a variety of forms, such as training, group teaching, or individual counseling. |  |  |  |  |  |
| 24) | Services are comprehensive and meet client needs (e.g., prevention, screening, diagnosis, treatment, palliative care, etc.). |  |  |  |  |  |
| 25) | Various media used for health promotion and information dissemination (e.g., brochures, online media) are modern and sufficient. |  |  |  |  |  |
| **3** | **Outcomes of Services** |  |  |  |  |  |
| 26) | Service costs are appropriate in relation to quality. |  |  |  |  |  |
| 27) | Knowledge has increased after receiving services. |  |  |  |  |  |
| 28) | Behavior has been modified according to given recommendations. |  |  |  |  |  |
| 29) | Overall satisfaction with the services received. |  |  |  |  |  |
| 30) | Overall dissatisfaction with the services received. |  |  |  |  |  |

**Part 3: Interview on Opinions and Suggestions for Service Improvement**

1. In terms of **structure** (organizational characteristics, equipment/resources, human resources), how should services be developed and improved?

………………………………………………………………………………………………………………………………………………………………………………………………

1. In terms of **process** (care relationships, care techniques, health education), how should services be developed and improved?

………………………………………………………………………………………………………………………………………………………………………………………………

1. In terms of **outcomes of services** (satisfaction), how should services be developed and improved?

………………………………………………………………………………………………………………………………………………………………………………………………

1. In **other aspects**, how should services be developed and improved?

………………………………………………………………………………………………………………………………………………………………………………………………

**Set 2: For Service Providers**

**Akkhararajakumari College of Nursing**
Evaluator Code: …………

**Research Project:** “Development of a Prototype Model for the Center of Excellence in Integrated Cancer Services”

**Set 2: Satisfaction Questionnaire on Services of the Center of Excellence in Integrated Cancer Services**

**Instructions:**
This satisfaction questionnaire consists of three parts:

- **Part 1:** General information of service providers
- **Part 2:** Satisfaction with the services of the Center of Excellence in Integrated Cancer Services
- **Part 3:** Interview on opinions and suggestions for service improvement

Please mark (✓) the choice that best reflects your actual situation and your opinion.

**Part 1: General Information of Service Providers**

1. **Sex**
   - Male
   - Female
2. **Age**
   Please specify (full years): …………
3. **Highest Education Level**
   - Lower secondary school
   - Upper secondary school / equivalent
   - Diploma
   - Bachelor’s degree
   - Master’s degree or higher
   - Other (please specify): …………
4. **Professional Status**
   - Physician
   - Nurse
   - Pharmacist
   - Service staff at the Center
   - Other (please specify): …………
5. **Monthly Income**
   - 10,000–20,000 THB
   - 20,001–30,000 THB
   - 30,001–40,000 THB
   - 40,001 THB and above
   - Other (please specify): …………
6. **Length of Work Experience Related to Services in the Center of Excellence in Integrated Cancer Services**
   Please specify duration: ………… months
7. **Type of Cancer Services Provided at the Center of Excellence in Integrated Cancer Services**
   *(More than one option may be selected)*
   - Cancer prevention and risk reduction
   - Cancer screening and early detection
   - Cancer diagnosis
   - Cancer treatment
   - Palliative care
   - Cancer information services
   - Cancer research services

**Part 2: Satisfaction with the Services of the Center of Excellence in Integrated Cancer Services**

Please indicate your opinion by marking the score that best reflects your level of satisfaction according to the following scale:

1 = Least satisfied / Not satisfied
2 = Slightly satisfied
3 = Moderately satisfied
4 = Very satisfied
5 = Most satisfied

|  | **Items** | **level of satisfaction** | | | | |
| --- | --- | --- | --- | --- | --- | --- |
| **1** | **2** | **3** | **4** | **5** |
| **1** | **Structure** |  |  |  |  |  |
| **1.1** | **Organizational Characteristics** |  |  |  |  |  |
| 1) | The location of the center is convenient for providing services. |  |  |  |  |  |
| 2) | The landscaping is clean and visually pleasant. |  |  |  |  |  |
| 3) | The arrangement of facilities and service rooms is orderly, convenient, and safe for use. |  |  |  |  |  |
| 4) | Service maps and procedures are clear and easy to understand. |  |  |  |  |  |
| 5) | Policy and development plans are modern and aligned with the current situation. |  |  |  |  |  |
| 6) | Roles and responsibilities of personnel are clearly assigned. |  |  |  |  |  |
| 7) | Services follow a systematic and standardized approach. |  |  |  |  |  |
| 8) | Operational manuals are step-by-step and easy to understand. |  |  |  |  |  |
| 9) | Budget and funding sources are sufficient for operations. |  |  |  |  |  |
| 10) | Public relations and service promotion are appropriate. |  |  |  |  |  |
| 11) | Administrative systems are appropriate and facilitate work and service delivery. |  |  |  |  |  |
| 12) | Development of the center into a learning and research hub for integrated cancer care is of high quality. |  |  |  |  |  |
| 13) | Research to generate knowledge is conducted continuously. |  |  |  |  |  |
| 14) | Knowledge management processes for quality improvement are effective. |  |  |  |  |  |
| 15) | Service delivery has a health network in collaboration with hospitals and communities. |  |  |  |  |  |
| 16) | Performance evaluation and monitoring are systematic and clear |  |  |  |  |  |
| **1.2** | **Resources and Equipment** |  |  |  |  |  |
| 17) | Facilities such as parking, seating, ramps, elevators, restrooms, drinking water, newspapers, journals, books, etc., are appropriate. |  |  |  |  |  |
| 18) | Equipment, tools, and supplies are sufficient in number. |  |  |  |  |  |
| 19) | Equipment, tools, and supplies are of good quality and modern. |  |  |  |  |  |
| 20) | Internet and Wi-Fi services are convenient to use. |  |  |  |  |  |
| 21) | Public relations materials, manuals, and educational documents are modern and sufficient. |  |  |  |  |  |
| 22) | Information systems and advanced technology used in service delivery are of good quality. |  |  |  |  |  |
| 23) | Necessary technology improvements are carried out continuously. |  |  |  |  |  |
| **1.3** | **Human Resources** |  |  |  |  |  |
| 24) | Staff knowledge and abilities are appropriate. |  |  |  |  |  |
| 25) | Staff experience and expertise are appropriate. |  |  |  |  |  |
| 26) | Staff knowledge development is conducted with quality. |  |  |  |  |  |
| 27) | Training programs to enhance knowledge and skills for service delivery are appropriate. |  |  |  |  |  |
| 28) | Staff development to conduct research is appropriate. |  |  |  |  |  |
| 29) | The number of staff is sufficient to provide services. |  |  |  |  |  |
| **2** | **Process** |  |  |  |  |  |
| 30) | Service providers are willing, attentive, and caring in providing services. |  |  |  |  |  |
| 31) | Service providers allow opportunities to ask questions and clarify doubts. |  |  |  |  |  |
| 32) | Service providers communicate politely and gently. |  |  |  |  |  |
| 33) | Service providers communicate truthfully and accurately. |  |  |  |  |  |
| 34) | Services are provided quickly without long waiting times. |  |  |  |  |  |
| 35) | Services are systematic and follow proper sequences, without favoritism or skipping queues. |  |  |  |  |  |
| 36) | Services respect clients’ rights and confidentiality. |  |  |  |  |  |
| 37) | Methods, approaches, and techniques used for health education are appropriate. |  |  |  |  |  |
| 38) | Services are provided in a variety of forms (e.g., training, group teaching, individual counseling, etc.). |  |  |  |  |  |
| 39) | The service system covers all seven domains according to the service plan (prevention, screening, diagnosis, treatment, palliative care, research, and information). |  |  |  |  |  |
| 40) | Media used for health promotion (e.g., brochures, online media) are modern. |  |  |  |  |  |
| 41) | Communication within the service network is effective. |  |  |  |  |  |
| 42) | Service continuity management is effective. |  |  |  |  |  |
| 43) | Problem-solving is timely, efficient, and effective. |  |  |  |  |  |
| **3** | **Outcomes of Services** |  |  |  |  |  |
| 44) | Services are convenient and timely. |  |  |  |  |  |
| 45) | Appropriateness of colleagues (in terms of number, qualifications, knowledge, and expertise). |  |  |  |  |  |
| 46) | Time required to perform tasks is appropriate for the activities carried out. |  |  |  |  |  |
| 47) | Service costs are appropriate in relation to quality. |  |  |  |  |  |
| 48) | The reputation and success of the Center are well recognized. |  |  |  |  |  |
| 49) | Overall satisfaction with the services. |  |  |  |  |  |
| 50) | Overall dissatisfaction with the services. |  |  |  |  |  |

**Part 3: Interview on Opinions and Suggestions for Service Improvement**

1. **Structure** (organizational characteristics, equipment/resources, human resources):
   What aspects should be developed and improved, and how should this be done?

………………………………………………………………………………………………………………………………………………………………………………………………

1. **Process** (care techniques, care relationships, health education):
   What aspects should be developed and improved, and how should this be done?

………………………………………………………………………………………………………………………………………………………………………………………………

1. **Service Outcomes**:
   What aspects should be developed and improved, and how should this be done?

………………………………………………………………………………………………………………………………………………………………………………………………

1. **Other Areas**:
   What aspects should be developed and improved, and how should this be done?

………………………………………………………………………………………………………………………………………………………………………………………………

**Thank you for your cooperation and for taking the time to provide valuable information.**

Date: ………………… Month: ………………… Year (B.E.): …………………
